# Supplementary material for: Targeted Restoration of the Intestinal Microbiota with a Simple, Defined Bacteriotherapy Resolves Relapsing Clostridium difficile Disease in Mice
Source: PLoS Pathog. 2012 Oct 25;8(10):e1002995. doi: 10.1371/journal.ppat.1002995 (PMC3486913; doi:10.1371/journal.ppat.1002995)
Supplement: Table S1 — Differential gene expression between C. difficile 027/BI7 and 017/M68 infected cecal tissues. Host gene expression was assessed on mice infected with either C. difficile 027/BI7 or C. difficile 017/M68 for 5 days or clindamycin-treated uninfected controls. Genes differentially expressed between the two infected groups are shown in the table. (XLSX) [file ppat.1002995.s009.xlsx]

## Sheet: Sheet1
Gene	Fold Change	FDR p-value	Accession
Aqp4	7.36721	0.00465112	NM_009700
Gna14	4.116	0.0156026	NM_008137.2
Retnlg	3.63779	0.0227704	NM_181596.2
Socs3	3.57031	0.0438653	NM_007707.2
S100a8	3.52742	0.0211116	NM_013650.1
Ly6a	2.70521	0.0329306	NM_010738.2
Cd177	2.61284	0.0156147	NM_026862.3
Gch1	2.24204	0.00769104	NM_008102.2
Cxcl1	2.10763	0.0465924	NM_008176.1
S100a11	2.00675	0.0156147	NM_016740.3
Mmp10	1.98899	0.0298032	NM_019471.1
Ddah1	1.71766	0.0143202	NM_026993
Nlrx1	1.62275	0.00748875	NM_178420.2
Il18	1.62024	0.0245143	NM_008360.1
Noxo1	1.59347	0.0296373	NM_027988.1
Gpx2	1.59075	0.0211116	NM_030677.1
Scotin	1.51419	0.0290215	NM_025858.1
Vdr	-1.51066	0.0271895	NM_009504.2
Edn1	-1.51485	0.049834	NM_010104.2
Nr1i3	-1.53121	0.0375844	NM_009803.2
Sectm1	-1.55061	0.0398295	NM_026907.2
Vldlr	-1.56702	0.0305385	NM_013703.1
Cyp4f13	-1.57597	0.0314134	NM_130882.1
Cxcl13	-1.59505	0.0328478	NM_018866.1
Farp2	-1.60351	0.0211116	NM_145519.1
Rbp2	-1.60443	0.0355613	NM_009034.2
Acsl3	-1.67788	0.0448173	NM_028817.2
Ugt8	-1.71781	0.024629	NM_011674.2
PLA2	-1.71974	0.0499538	AK033572
Cyp2d26	-1.72892	0.0286807	NM_029562.1
Ang1	-1.73092	0.00841895	NM_007447.2
Ddc	-1.82674	0.0164806	NM_016672
Azgp1	-1.8397	0.0156026	NM_013478.1
Abp1	-1.87689	0.0212387	NM_029638.1
Sepp1	-1.95953	0.0375844	NM_009155.3
Sgk	-2.06679	0.0225453	NM_011361
Scin	-2.11869	0.0375844	NM_009132.1
Dpep1	-2.21354	0.0395367	NM_007876.1
Cyp2d22	-2.22221	0.0326614	NM_019823.2
Sult1a1	-2.28767	0.0232853	NM_133670
Cmtm8	-2.42075	0.0156026	NM_027294.1
Sycn	-2.56225	0.0221398	NM_026716.2
Trpm6	-2.86603	0.0286218	NM_153417.1
Indo	-2.93324	0.0305763	NM_008324.1
Ly6g6c	-3.41706	0.0239304	NM_023463.2
Clca3	-3.42323	0.0271068	NM_017474
Trpv6	-3.61968	0.0114508	NM_022413.2
Cyp2c55	-4.05203	0.0357975	NM_028089.1
