# Supplementary material for: Targeted Restoration of the Intestinal Microbiota with a Simple, Defined Bacteriotherapy Resolves Relapsing Clostridium difficile Disease in Mice
Source: PLoS Pathog. 2012 Oct 25;8(10):e1002995. doi: 10.1371/journal.ppat.1002995 (PMC3486913; doi:10.1371/journal.ppat.1002995)
Supplement: Table S4 — Summary of data used whole genome phylogeny of intestinal bacteria presented in Figure 5 . (XLSX) [file ppat.1002995.s012.xlsx]

## Sheet: sample_acc_numbers
Species	Accession Number / link	Source
Proteus mirabilis	am942759
Escherichia coli	cp000802
Citrobacter rodentium	fn543502
Enterobacter cloacae	FP929040	MetaHIT
Klebsiella pneumoniae	ERS012055
Alistipes shahii	FP929032	MetaHIT
Bacteroidetes sp. nov.	ERS084472
Parabacteroides distasonis	cp000140
Bacteroides fragilis	fq312004
Bacteroides thetaiotaomicron	ae015928
Bacteroides xylanisolvens	FP929033	MetaHIT
Bacteroides vulgatus	cp000139
Bacteroides dorei	ftp://ftp.sanger.ac.uk/pub/pathogens/Bacteroides/dorei/D8/improved/Bacteroides_dorei_D8.fasta	MetaHIT
Bifidobacterium pseudocatenulatum	ftp://ftp.sanger.ac.uk/pub/pathogens/Bifidobacterium/pseudocatenulatum/D2CA/improved/Bifidobacterium_pseudocatenulatum_D2CA.fasta	MetaHIT
Bifidobacterium bifidum	cp001840
Bifidobacterium breve	cp000303
Bifidobacterium longum	cp000605
Atopobium parvulum	cp001721
Enterorhabdus sp. nov.	ERS084471
Enterorhabdus mucosicola	ERS084484
Eggerthella lenta	cp001726
Gordonibacter pamelaeae	FP929047	MetaHIT
Bacillus subtilis	CM000488
Staphylococcus aureus	FN433596
Staphylococcus haemolyticus	AP006716
Staphylococcus epidermidis	CP000029
Staphylococcus pasteuri	ERS084477
Staphylococcus warneri	ERS084483
Staphylococcus warneri	ERS084478
Listeria monocytogenes	CP001604
Lactobacillus casei	CP000423
Lactobacillus rhamnosus	FM179323
Lactobacillus fermentum	CP002033
Lactobacillus reuteri	ERS084469
Lactobacillus reuteri	ERS084476
Lactobacillus reuteri	AP007281
Lactobacillus brevis	CP000416
Lactobacillus plantarum	CP002222
Streptococcus thermophilus	CP000023
Streptococcus gordonii	CP000725
Enterococcus faecalis	CP002491
Enterococcus durans	ERS084475
Enterococcus faecium	GG692468-GG692536	Enterococcus group Sequencing Project, Broad Institute of Harvard and MIT (http://www.broadinstitute.org/
Enterococcus hirae	ERS084482
Enterococcus hirae	ERS084473
Enterococcus hirae	ERS084474
Enterococcus casseliflavus	ACAH00000000	Enterococcus group Sequencing Project, Broad Institute of Harvard and MIT (http://www.broadinstitute.org/
Enterococcus gallinarum	ACAJ00000000	Enterococcus group Sequencing Project, Broad Institute of Harvard and MIT (http://www.broadinstitute.org/
Clostridium difficile	FN545816
Clostridium bartletti	ABEZ00000000	HGMI Project
Clostridium botulinum	CP000962
Clostridium cellulovorans	CP002160
Clostridium acetobutylicum	ae001437
Flavonifractor plautii	SRS084527	Human Microbiome Project, Clostridium group Sequencing Project, Broad Institute of Harvard and MIT (http://www.broadinstitute.org/)
Clostridium leptum	ABCB00000000	HGMI Project
Ruminococcus bromii	FP929051	MetaHIT
Eubacterium siraeum	FP929044	MetaHIT
Subdoligranulum variabile	SRS010483	HGMI Project
Faecalibacterium prausnitzii	FP929045	MetaHIT
Eubacterium hallii	ftp://ftp.sanger.ac.uk/pub/pathogens/Eubacterium/hallii/SM61/improved/Eubacterium_hallii_SM61.fasta	MetaHIT
Coprococcus catus	FP929038	MetaHIT
Anerostipes sp. nov.	ERS084470
Anaerostipes caccae	SRS211904	HGMI Project
Clostridium hathewayi	SRP006092	Human Microbiome Project, Clostridium group Sequencing Project, Broad Institute of Harvard and MIT (http://www.broadinstitute.org/)
Clostridium clostridioforme	SRP002711	Human Microbiome Project, Clostridium group Sequencing Project, Broad Institute of Harvard and MIT (http://www.broadinstitute.org/)
Clostridium bolteae	SRP002709	Human Microbiome Project, Clostridium group Sequencing Project, Broad Institute of Harvard and MIT (http://www.broadinstitute.org/)
Clostridium aldenense	SRP002708	Human Microbiome Project, Clostridium group Sequencing Project, Broad Institute of Harvard and MIT (http://www.broadinstitute.org/)
Clostridium citroniae	SRP003300	Human Microbiome Project, Clostridium group Sequencing Project, Broad Institute of Harvard and MIT (http://www.broadinstitute.org/)
Clostridium indolis	ERS084479
Clostridium saccharolyticum	FP929037	MetaHIT
Clostridium symbiosum	SRP003488	Human Microbiome Project, Clostridium group Sequencing Project, Broad Institute of Harvard and MIT (http://www.broadinstitute.org/)
Ruminococcus obeum	FP929054	MetaHIT
Blautia producta	TO SUBMIT TO ENA
Blautia producta	TO SUBMIT TO ENA
Blautia coccoides	ERS084481
Ruminococcus torques	FP929055	MetaHIT
Butyrivibrio fibrisolvens	FP929036	MetaHIT
Eubacterium rectale	FP929042	MetaHIT
Roseburia intestinalis	FP929049	MetaHIT

## Sheet: Genes_selected
Gene
30S ribosomal protein S1
30S ribosomal protein S10
30S ribosomal protein S13
30S ribosomal protein S14 type Z
30S ribosomal protein S16
30S ribosomal protein S17
30S ribosomal protein S19
30S ribosomal protein S3
30S ribosomal protein S5
30S ribosomal protein S7
30S ribosomal protein S8
50S ribosomal protein L1
50S ribosomal protein L11
50S ribosomal protein L14
50S ribosomal protein L15
50S ribosomal protein L16
50S ribosomal protein L18P
50S ribosomal protein L2
50S ribosomal protein L22
50S ribosomal protein L24
50S ribosomal protein L34
50S ribosomal protein L5
50S ribosomal protein L7/L12
adenylate kinase
adenylosuccinate synthetase
bacterial peptide chain release factor 2
D-methionine ABC transporter, ATP-binding protein
DNA gyrase subunit B
DNA primase
Excinuclease ABC subunit B
glutamine transport ATP-binding protein GlnQ
GMP synthase
heat shock protein GrpE
Holliday junction DNA helicase RuvA
KDP operon transcriptional regulatory protein KdpE
L-cystine import ATP-binding protein TcyC
methenyltetrahydrofolate cyclohydrolase
phenylalanyl-tRNA synthetase, alpha subunit
polyribonucleotide nucleotidyltransferase
Protein Translation Elongation Factor Ts (EF-Ts)
transcription termination/antitermination factor NusG
translation initiation factor IF-1
Triosephosphate isomerase
YmdA/YtgF family protein
